# Supplementary material for: A novel nutraceutical formulation increases telomere length and activates telomerase activity in middle‑aged rats
Source: PubMed Central journal article supplement — Mol Med Rep. 2023 Oct 27;28(6):232. doi: 10.3892/mmr.2023.13119 (PMC10668076; doi:10.3892/mmr.2023.13119), 2023-10-27
Supplement: Supplementary_Data.pdf [file Supplementary_Data.pdf]

Table SI. Kolmogorov- Smirnov tests for normality results.

|                                 |                 | Young Controls |         | Old Controls |         | Old Group1 |         | Old Group2 |         |
|---------------------------------|-----------------|----------------|---------|--------------|---------|------------|---------|------------|---------|
|                                 |                 | TL pre         | TL post | TL pre       | TL post | TL pre     | TL post | TL pre     | TL post |
| <b>Most Extreme Differences</b> | <b>Absolute</b> | 0.047          | 0.040   | 0.080        | 0.150   | 0.052      | 0.137   | 0.079      | 0.240   |
|                                 | <b>Positive</b> | 0.047          | 0.040   | 0.080        | 0.150   | 0.052      | 0.137   | 0.079      | 0.240   |
|                                 | <b>Negative</b> | 0.029          | 0.037   | 0.038        | 0.086   | 0.034      | 0.068   | 0.039      | 0.152   |
| <b>Test Statistic</b>           |                 | 0.047          | 0.040   | 0.080        | 0.150   | 0.052      | 0.137   | 0.079      | 0.240   |
| <b>p</b>                        |                 | 0.004          | 0.028   | <0.001       | <0.001  | 0.004      | <0.001  | <0.001     | <0.001  |

Table SII. Bivariate comparisons of groups in TL at baseline (start) and at the end of the experiment. Use of adjusted t-tests (LSD, Dunnett and Bonferroni).

|      |                 | <b>LSD</b>       |               |               | <b>Bonferroni</b> |               |               | <b>Dunnett</b> |
|------|-----------------|------------------|---------------|---------------|-------------------|---------------|---------------|----------------|
|      |                 | <b>(J) Group</b> |               |               | <b>(J) Group</b>  |               |               | <b>t</b>       |
|      |                 | <b>Old</b>       | <b>Old</b>    | <b>Old</b>    | <b>Old</b>        | <b>Old</b>    | <b>Old</b>    | <b>OC-18</b>   |
|      |                 | <b>Controls</b>  | <b>Group1</b> | <b>Group2</b> | <b>Controls</b>   | <b>Group1</b> | <b>Group2</b> |                |
| TL   | Group           | p                | p             | p             | p                 | p             | p             | p              |
| Pre  | <b>Old</b>      |                  | 0.608         | 0.600         |                   | 1.000         | 1.000         |                |
|      | <b>Controls</b> |                  |               |               |                   |               |               |                |
|      | <b>Old</b>      | 0.608            |               | 0.988         | 1.000             |               | 1.000         | 0.835          |
|      | <b>Group1</b>   |                  |               |               |                   |               |               |                |
|      | <b>Old</b>      | 0.600            | 0.988         |               | 1.000             | 1.000         |               | 0.828          |
|      | <b>Group2</b>   |                  |               |               |                   |               |               |                |
| Post | <b>Old</b>      |                  | <0.001        | <0.001        |                   | <0.001        | <0.001        |                |
|      | <b>Controls</b> |                  |               |               |                   |               |               |                |
|      | <b>Old</b>      | <0.001           |               | <0.001        | <0.001            |               | <0.001        | <0.001         |
|      | <b>Group1</b>   |                  |               |               |                   |               |               |                |
|      | <b>Old</b>      | <0.001           | <0.001        |               | <0.001            | <0.001        |               | <0.001         |
|      | <b>Group2</b>   |                  |               |               |                   |               |               |                |

Table SIII. Bivariate comparisons of groups in TL at the start and at the end of the experiment. Use of adjusted Dunn's test

| <b>Group (i)</b>  | <b>Group (j)</b>  | <b>Z</b> | <b>p*</b> | <b>Adjusted p**</b> |
|-------------------|-------------------|----------|-----------|---------------------|
| <b>Old Group1</b> | <b>Old Group1</b> | -9.24    | <0.001    | <0.001              |
| <b>Old Group1</b> | <b>Old Group2</b> | -10.27   | <0.001    | <0.001              |
| <b>Old Group2</b> | <b>Old Group2</b> | -1.011   | 0.312     | 0.935               |

\* asymptotic significance

\*\* adjusted by Bonferroni correction.

Table SIV. TL difference ( $\Delta$ TL=post-pre) and TL rate/month ( $\Delta$ TL/month) of control and treatment groups

| $\Delta$ TL           | Mean  | 95%LL | 95%UL | Median |
|-----------------------|-------|-------|-------|--------|
| <b>Young Controls</b> | 4932  | 5050  | 4815  | 4855   |
| <b>Old Controls</b>   | 2149  | 2204  | 2094  | 2135   |
| <b>Old Group1</b>     | 102   | 241   | -36   | 991    |
| <b>Old Group2</b>     | -3132 | -2521 | -3743 | 930    |
| $\Delta$ TL rate      | Mean  | 95%LL | 95%UL | Median |
| <b>Young Controls</b> | 1644  | 1683  | 1605  | 1618   |
| <b>Old Controls</b>   | 716   | 735   | 698   | 712    |
| <b>Old Group1</b>     | 34    | 80    | -12   | 330    |
| <b>Old Group2</b>     | -1044 | -840  | -1248 | 310    |
